# Supplementary material
Source: PubMed Central journal article supplement (PMC4178704)
Supplement: AEM.01953-14_zam999105693so1.pdf [file AEM.01953-14_zam999105693so1.pdf]

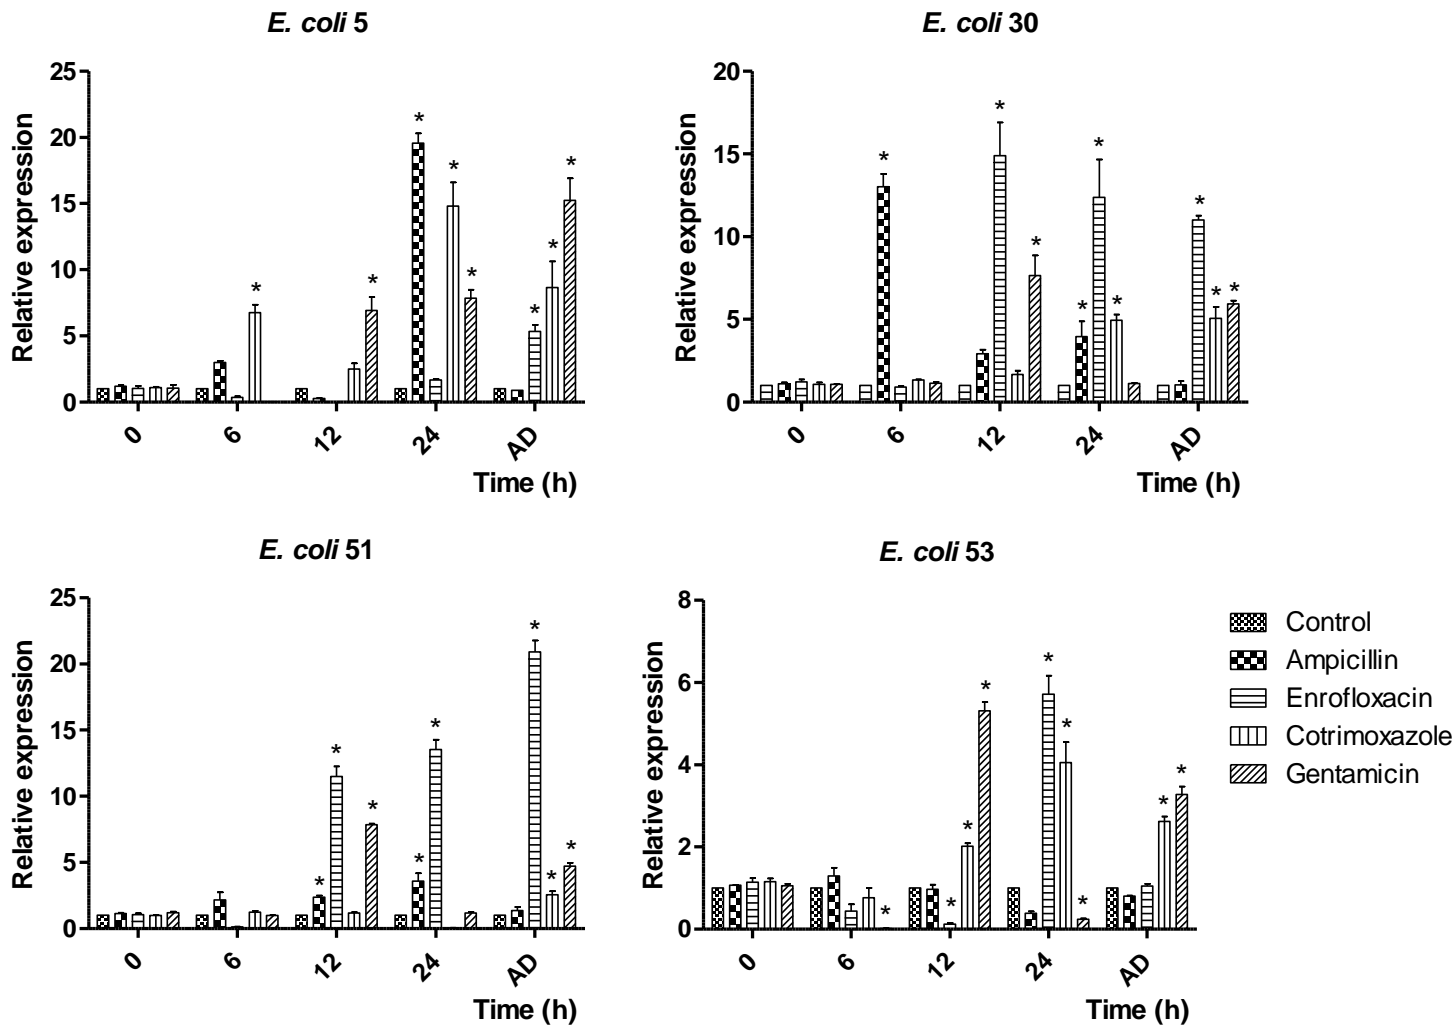

Fig. S1. *luxS* expression profile in *E. coli* biofilm producers isolates submitted to antimicrobials at 1/2 MIC concentration cultivated in abiotic surface at different times. (AD) Sessile cells after 24 h. Bars represent standard error of the mean. \*Significant at  $P < 0.05$ .

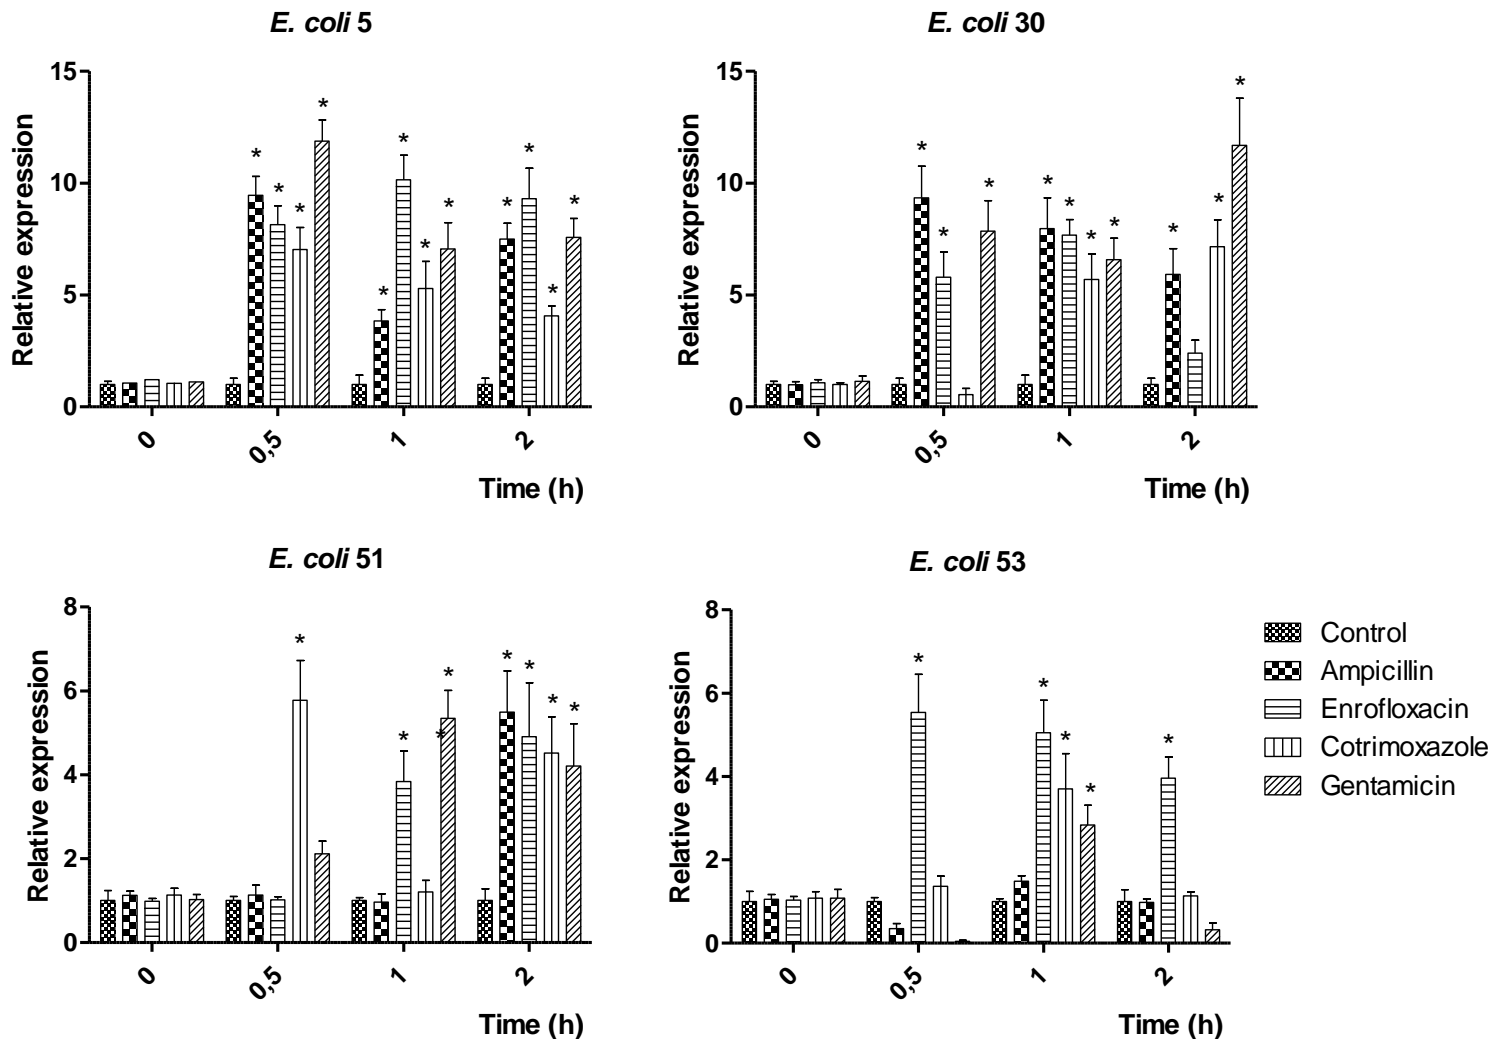

Fig. S2. *luxS* expression profile in *E. coli* biofilm producers isolates submitted to antimicrobials at  $\frac{1}{2}$  MIC concentration cultivated in biotic surface at different times. Bars represent standard error of the mean. \*Significant at  $P < 0.05$ .

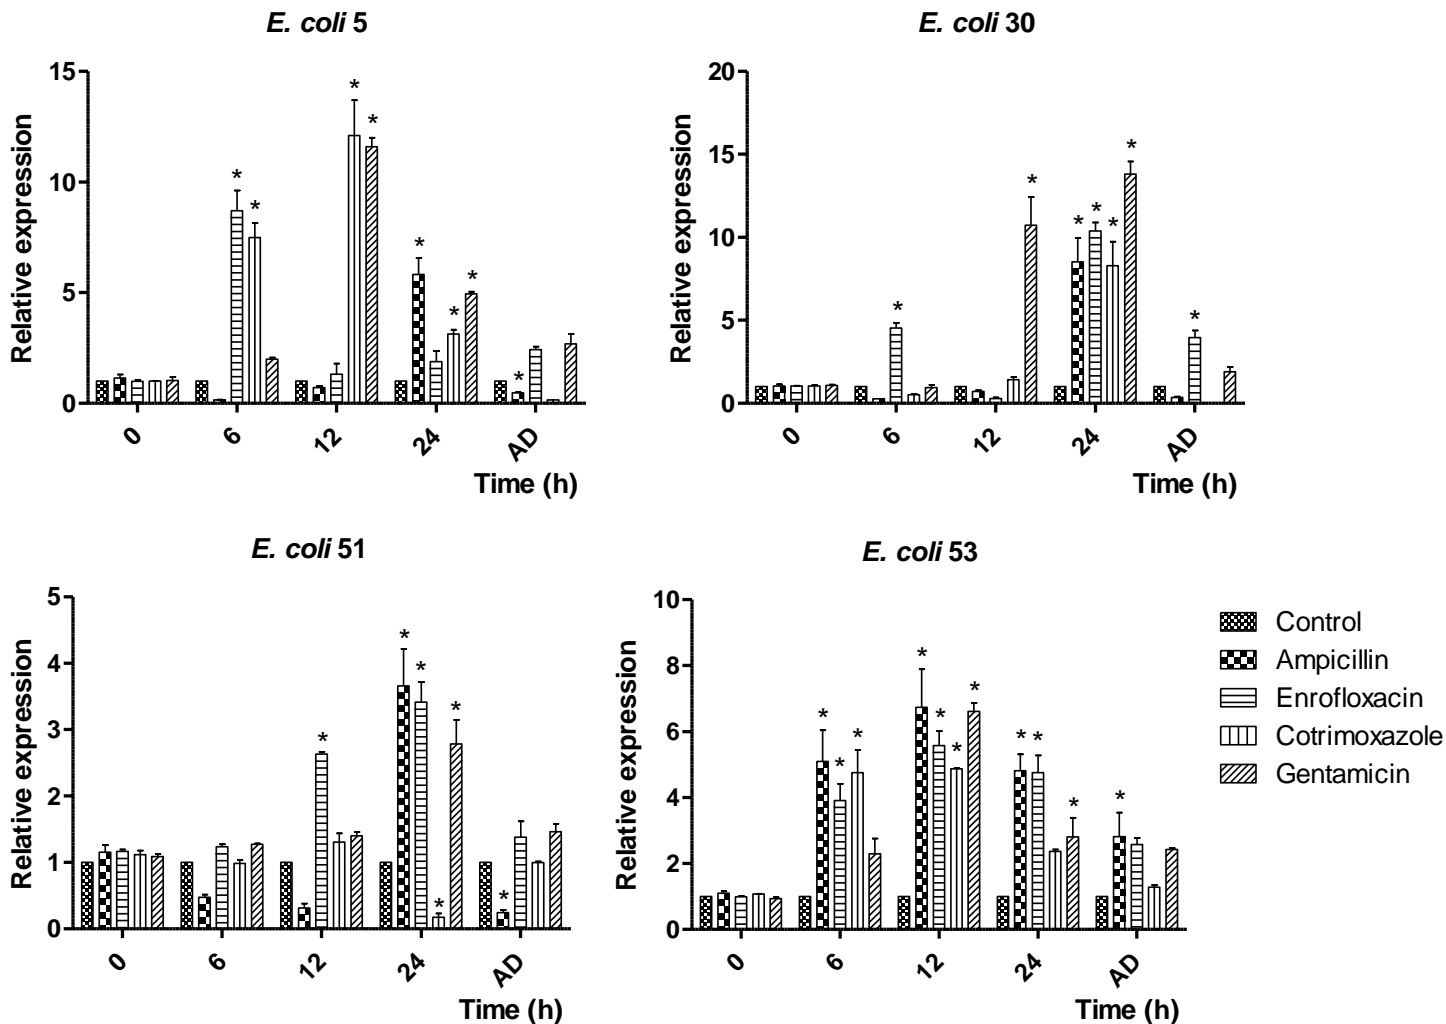

Fig. S3. *fliC* expression profile in *E. coli* biofilm producers isolates submitted to antimicrobials at  $\frac{1}{2}$  MIC concentration cultivated in abiotic surface at different times. (AD) Sessile cells after 24 h. Bars represent standard error of the mean. \*Significant at  $P < 0.05$ .

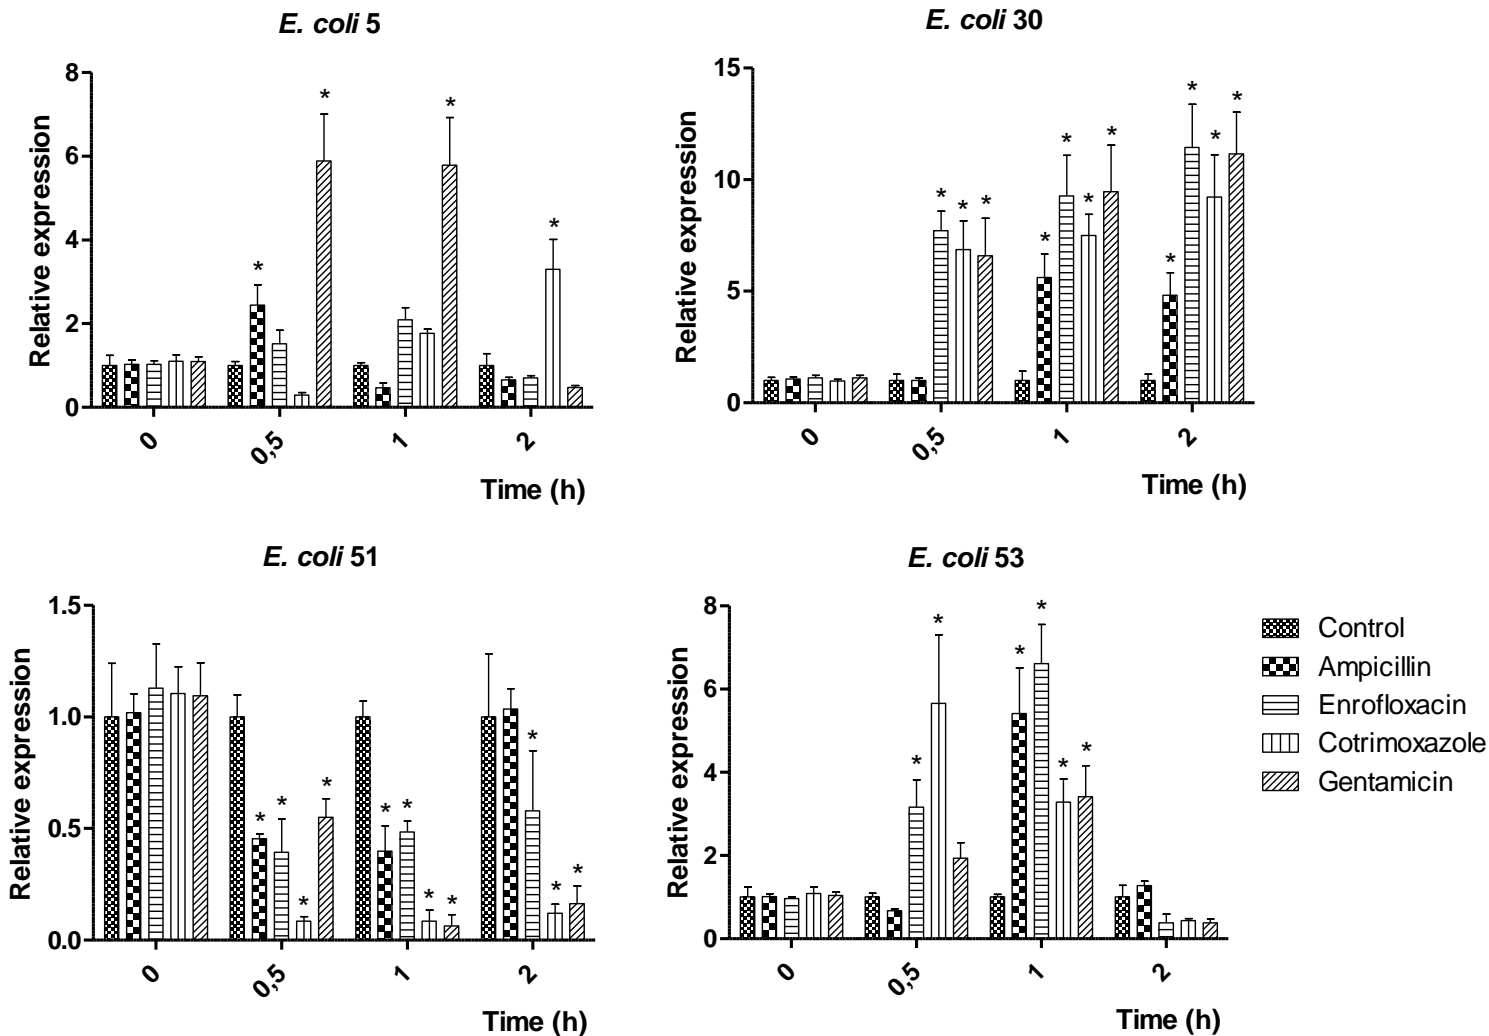

Fig. S4. *fliC* expression profile in *E. coli* biofilm producers isolates submitted to antimicrobials at  $\frac{1}{2}$  MIC concentration cultivated in biotic surface at different times. Bars represent standard error of the mean. \*Significant at  $P < 0.05$ .

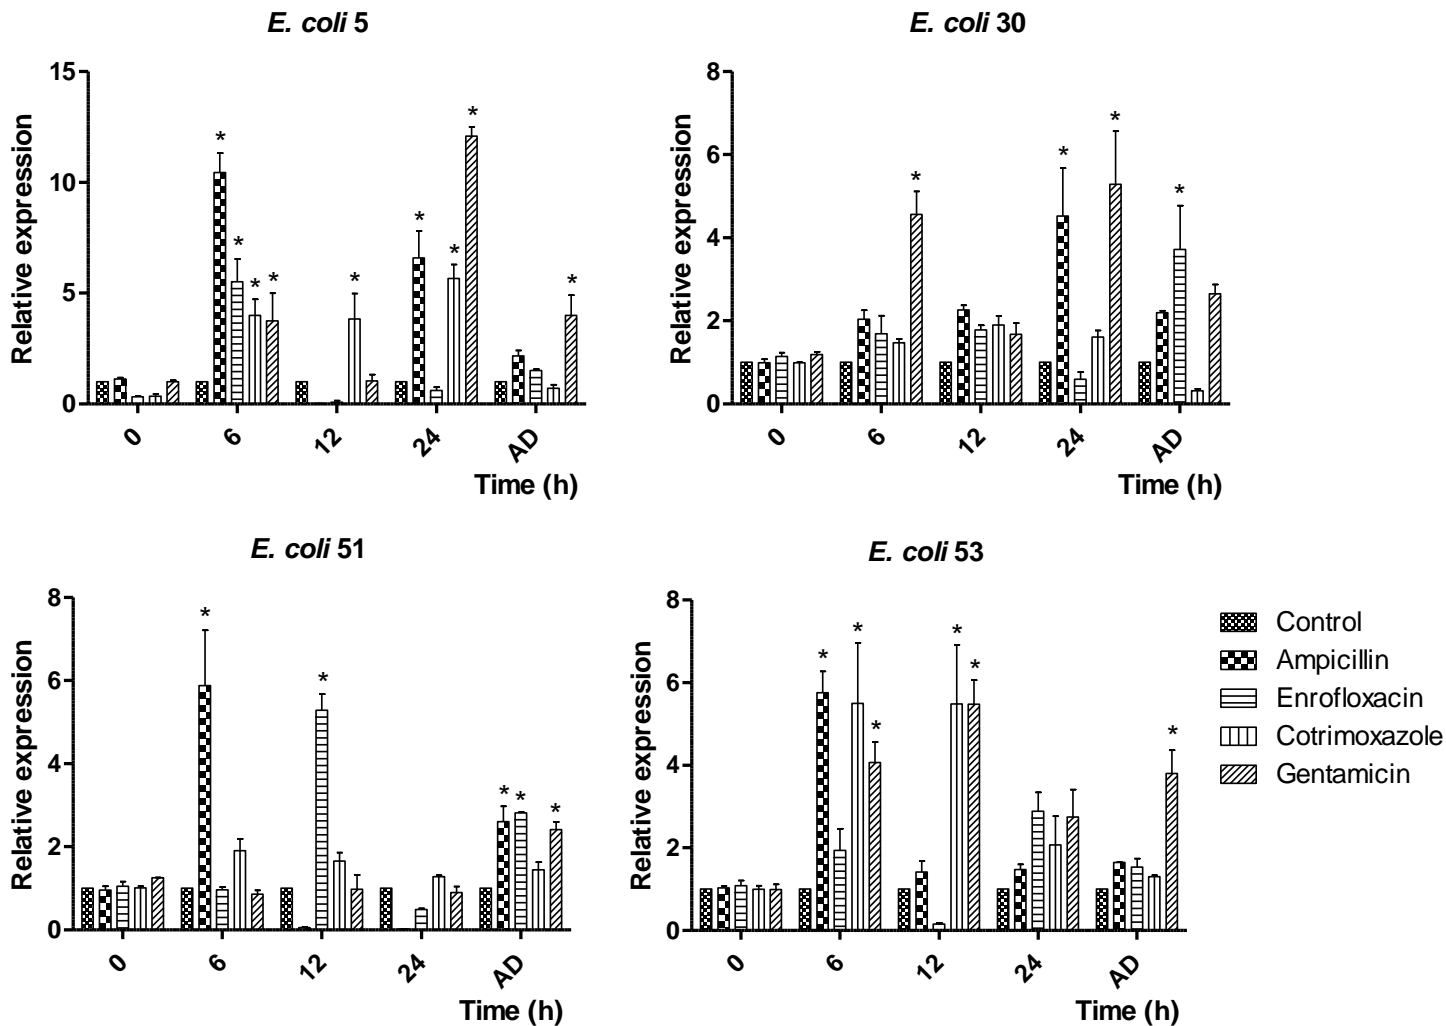

Fig. S5. *csgA* expression profile in *E. coli* biofilm producers isolates submitted to antimicrobials at 1/2 MIC concentration cultivated in abiotic surface at different times. (AD) Sessile cells after 24 h. Bars represent standard error of the mean. \*Significant at  $P < 0.05$ .

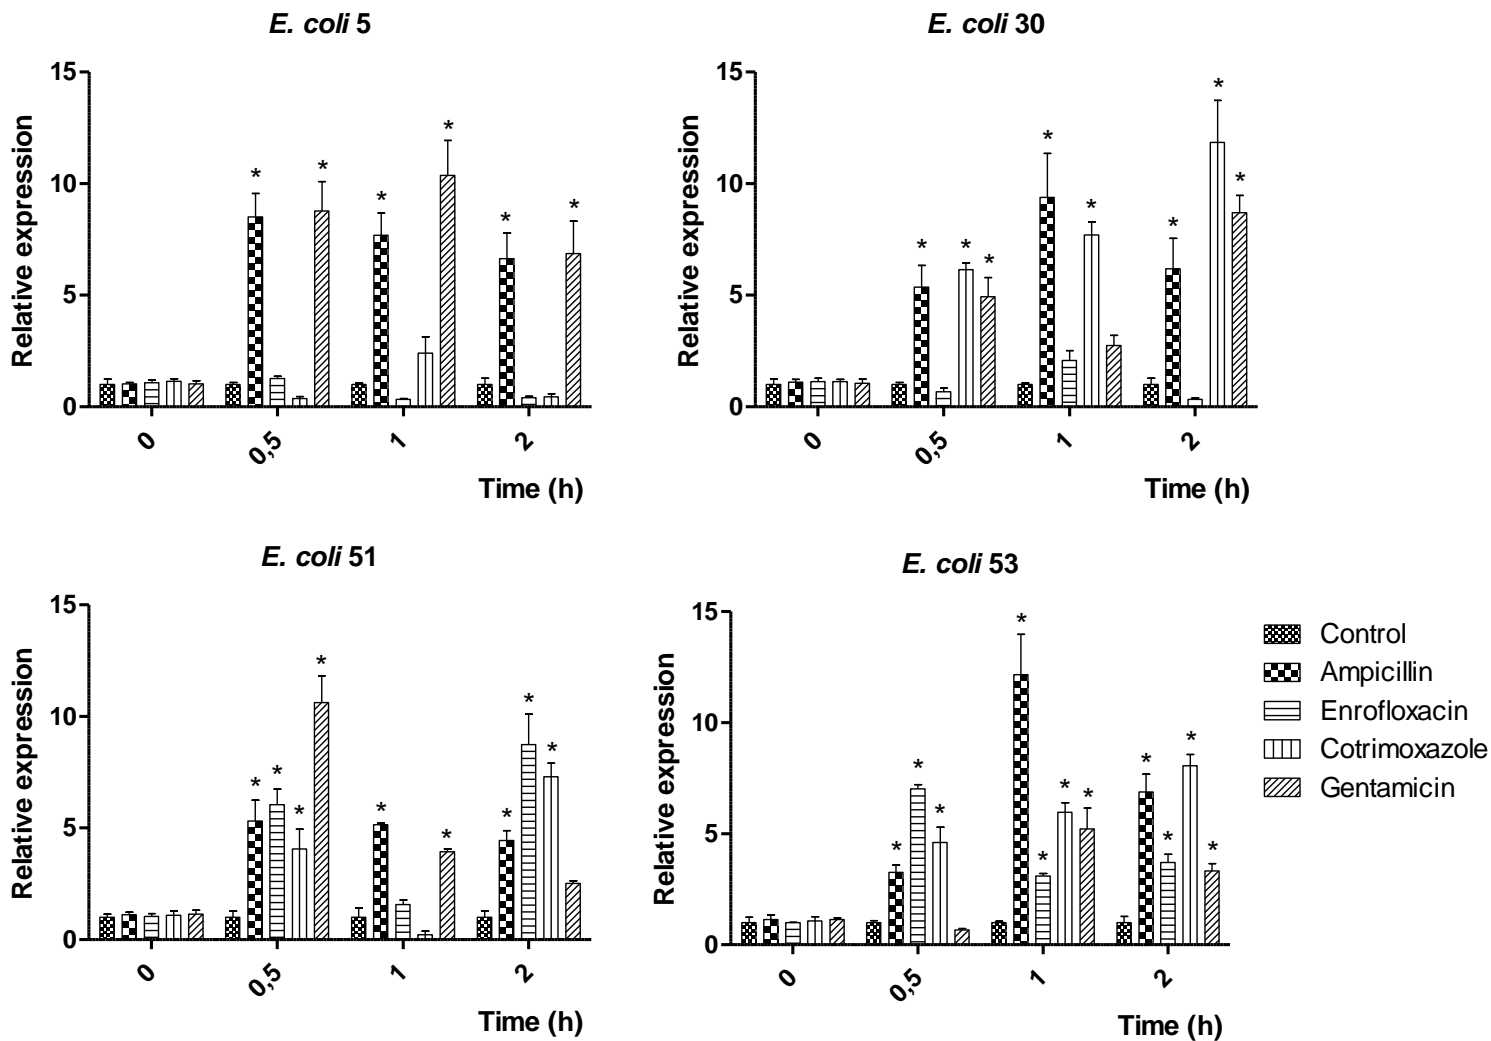

Fig. S6. *csgA* expression profile in *E. coli* biofilm producers isolates submitted to antimicrobials at  $\frac{1}{2}$  M IC concentration cultivated in biotic surface at different times. Bars represent standard error of the mean. \*Significant at  $P < 0.05$ .

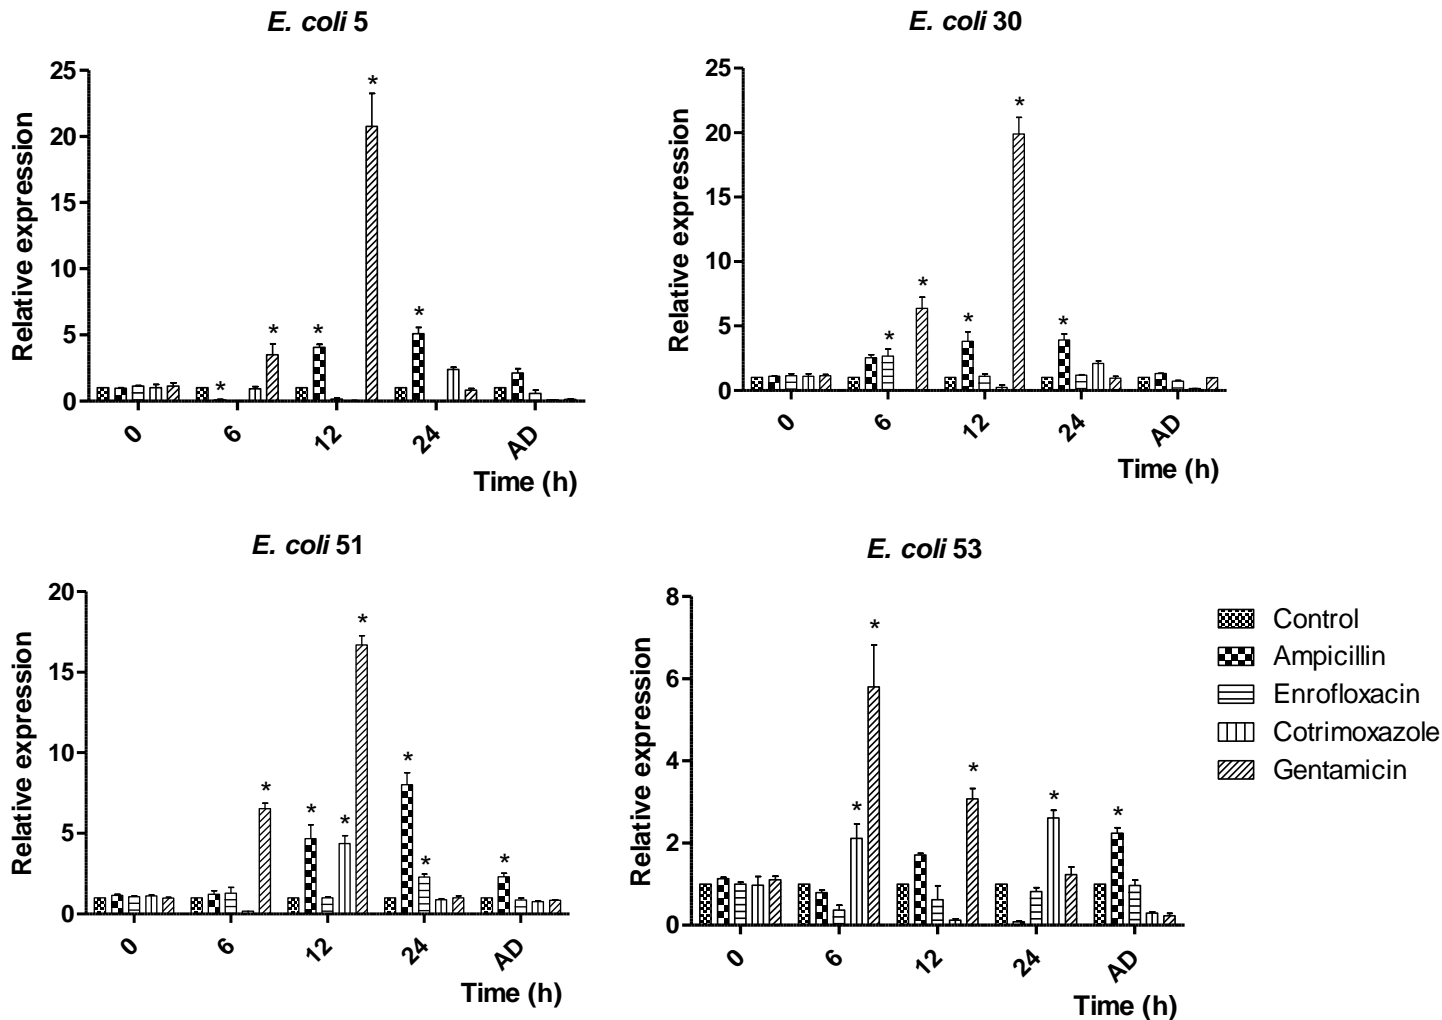

Fig. S7. *fimA* expression profile in *E. coli* biofilm producers isolates submitted to antimicrobials at  $\frac{1}{2}$  MIC concentration cultivated in abiotic surface at different times. (AD) Sessile cells after 24 h. Bars represent standard error of the mean. \*Significant at  $P < 0.05$ .

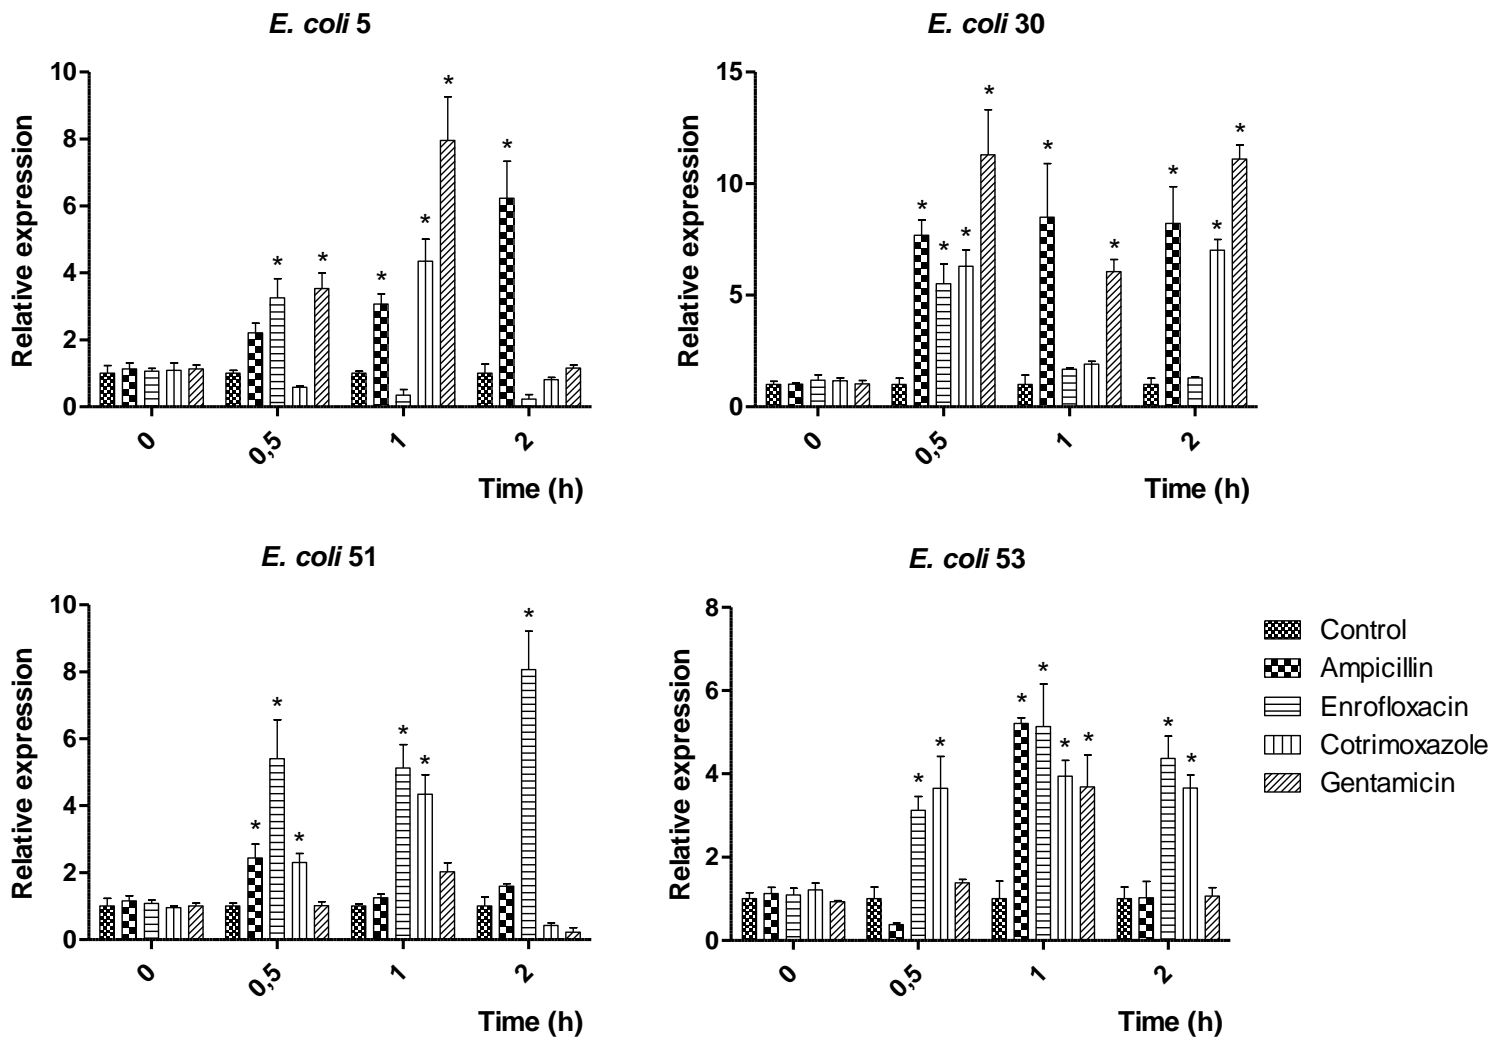

Fig. S8. *fimA* expression profile in *E. coli* biofilm producers isolates submitted to antimicrobials at  $\frac{1}{2}$  M IC concentration cultivated in biotic surface at different times. Bars represent standard error of the mean. \*Significant at  $P < 0.05$ .
